# Supplementary material
Source: publisher site journal article supplement (https://www.dovepress.com/article/339196)
Supplement: Supplementary file 1 [file get_supplementary_file.php]

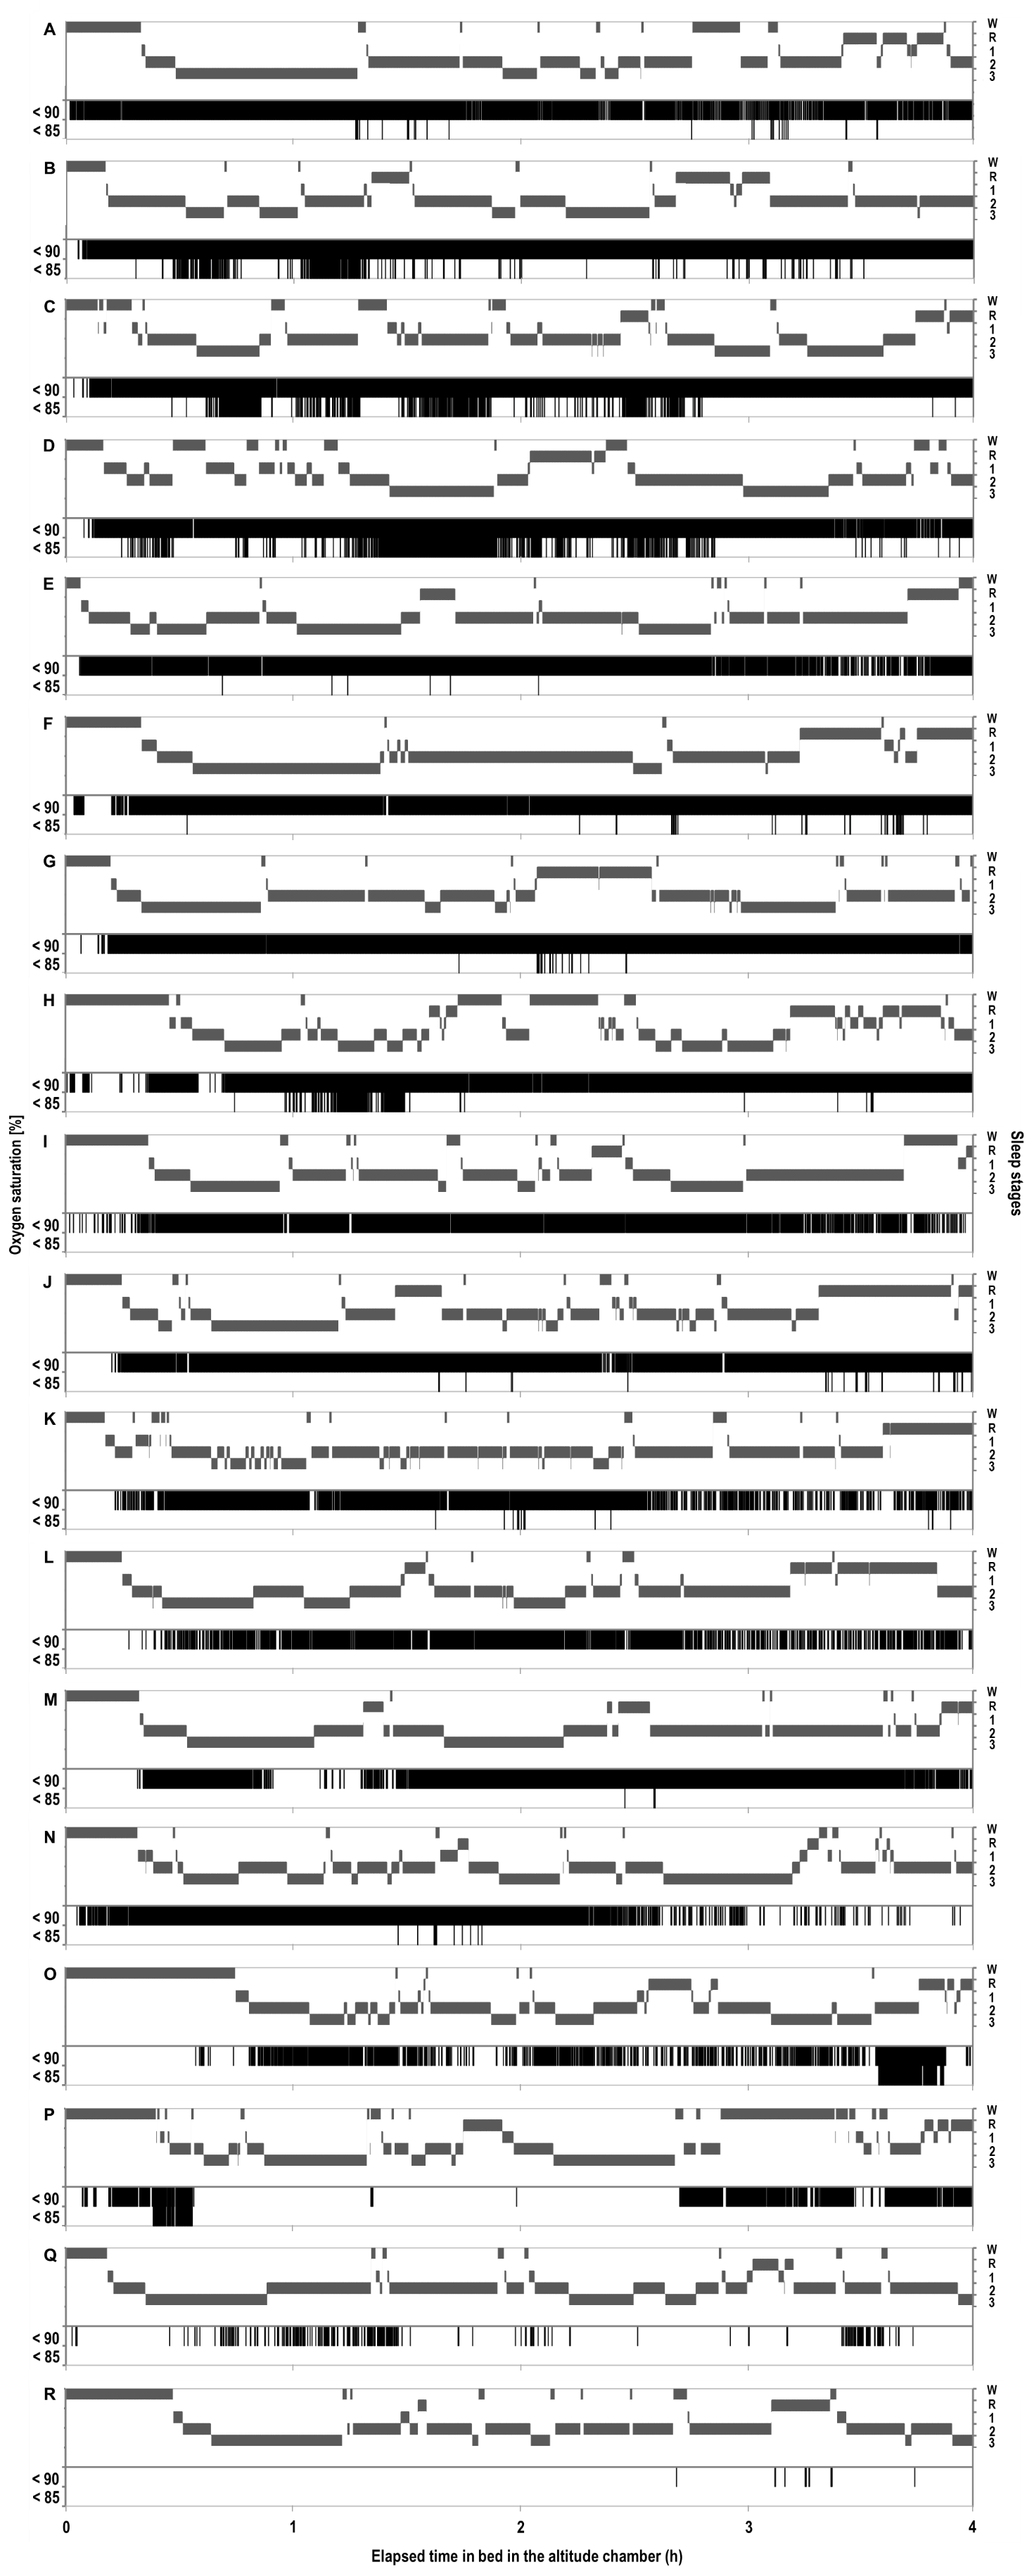


Supplemental Figure S1: Temporal distribution of oxygen desaturation events throughout the night. Panels A to R represent hypnograms and oxygen desaturation events per night for each of the 18 participants of study 1.
